# Supplementary material for: Regulation of Heat Stress in Physcomitrium (Physcomitrella) patens Provides Novel Insight into the Functions of Plant RNase H1s
Source: MDPI journal article supplement (doi:10.3390/ijms23169270), 2022-08-17
Supplement: s1 [file s1]

**Table S1.** Primers used for this article.

| Primer name    | Primer sequence (5'-3')                      | Usage               |
|----------------|----------------------------------------------|---------------------|
| PpOG1-A-rec-F  | CCAGTCACTATGGCGGCCGCATGGCGCCGAAGGCCAAAC      | Overexpression of A |
| PpOG1-A-rec-R  | TTCTCCTTTACCCATCTCGAGGTCTTCAATCTTTATCGAAATTG | Overexpression of A |
| F              | CTTGGTGTTTCGAGCTTTTCC                        | PCR for A           |
| R              | CCATGATGTATACGTTGTGGG                        | PCR for A           |
| Ppactin_F      | CGGAGAGGAAGTACAGTGTGTG                       | qRT-PCR for actin   |
| Ppactin_R      | ACCAGCCGTTAGAATTGAGCC                        | qRT-PCR for actin   |
| PpRNH1A-qPCR-F | ACCGGGCTTTCATATTAGGGT                        | qRT-PCR for A       |
| PpRNH1A-qPCR-R | GGAGTCCTTCATCGTTCACC                         | qRT-PCR for A       |

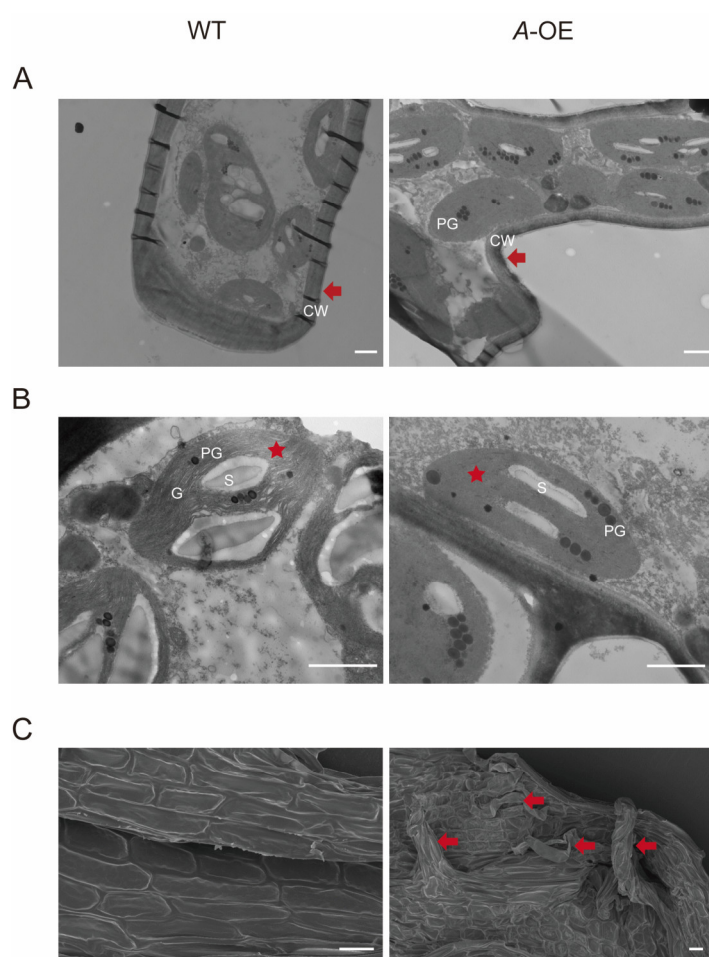

**Figure S1.** Morphology comparison between WT and A-OE plants. (A) Ultrastructure of cells of WT and A-OE were observed under transmission electron microscopy (TEM). Scale bar = 1  $\mu$ m. CW: cell wall; PG: plastoglobuli; the red arrows indicate the difference in cell wall between the WT and A-OE plants. (B) Ultrastructure of chloroplasts of WT and A-OE were observed under transmission electron microscopy (TEM). Scale bar=1 $\mu$ m. S: starch; G: granum; the red stars indicate the difference in chloroplast structure between the WT and A-OE plants. (C) The epidermal structure of WT and A-OE were observed under the scanning electron microscope (SEM). The red arrows indicate the protrusions and abnormalities on the surface of the A-OE plants. Scale bar = 20  $\mu$ m.
